# Supplementary material for: Thermal equilibria between conformers enable highly reliable single-fluorophore ratiometric thermometers
Source: Royal Society of Chemistry journal article supplement (doi:10.1039/d1an00741f), 2021-01-01
Supplement: d1an00741f1.pdf [file d1an00741f1.pdf]

## Supplementary Information

### Thermal equilibria between conformers enable highly reliable single-fluorophore ratiometric thermometers

*Tianruo Shen*<sup>a</sup>, *Xia Wu*<sup>a</sup>, *Davin Tan*<sup>a</sup>, *Zhaochao Xu*<sup>b</sup> and *Xiaogang Liu*<sup>a,\*</sup>

<sup>a</sup> Fluorescence Research Group, Singapore University of Technology and Design, 8 Somapah Road, Singapore 487372, Singapore

<sup>b</sup> CAS Key Laboratory of Separation Science for Analytical Chemistry, Dalian Institute of Chemical Physics, Chinese Academy of Sciences, Dalian 116023, China

## Contents

|                                                                                       |     |
|---------------------------------------------------------------------------------------|-----|
| 1. Experimental and computational methods .....                                       | S2  |
| 2. Temperature-dependent spectra of Rhodamine B and Acid Red 52 .....                 | S4  |
| 3. Optical properties and computational analysis of <b>BD140</b> .....                | S5  |
| 4. Optical properties and computational analysis of <b>LD688</b> and <b>DCM</b> ..... | S7  |
| 5. Reliability analysis of <b>BD140</b> at different dye concentrations.....          | S12 |
| 6. References .....                                                                   | S15 |

## 1. Experimental and computational methods

### Materials

**Table S1.** Details of the chemicals for the experiments.

| No. | Name                      | CAS No.      | Company       | Product No. |
|-----|---------------------------|--------------|---------------|-------------|
| 1   | BD140                     | 1201643-08-4 | TCI           | D4898       |
| 2   | 1,4-Dioxane (Diox)        | 123-91-1     | TCI           | D0860       |
| 3   | Dimethyl Sulfoxide (DMSO) | 67-68-5      | TCI           | D5293       |
| 4   | Formamide (FM)            | 75-12-7      | TCI           | F0045       |
| 5   | Ethanol (EtOH)            | 64-17-5      | TCI           | CT30        |
| 6   | Acid Red 52               | 3520-42-1    | TCI           | A0600       |
| 7   | LD688                     | 51325-95-2   | Exciton       | 06880       |
| 8   | DCM                       | 51325-91-8   | Exciton       | 06490       |
| 9   | Rhodamine 101             | 116450-56-7  | Exciton       | 06399       |
| 10  | Rhodamine 590             | 13161-28-9   | Exciton       | 05903       |
| 11  | Dimethylformamide (DMF)   | 68-12-2      | VWR           | 23466.298   |
| 12  | Ethylene Glycol (EG)      | 107-21-1     | VWR           | 24041.297   |
| 13  | Methylcyclohexane (MCH)   | 108-87-2     | Honeywell     | M37889      |
| 14  | Rhodamine B               | 81-88-9      | Sigma Aldrich | 83689       |
| 15  | Acetonitrile (ACN)        | 75-05-8      | Sigma Aldrich | 271004      |

### Spectral measurements

The UV-vis absorption and emission spectra were recorded using Duetta Fluorescence and Absorbance Spectrometer from HORIBA Scientific. Temperatures were adjusted by use of EXT-400 Liquid Cooling System from Koolance Inc and TC1 Temperature Controller from Quantum Northwest Inc.

The UV-vis absorption and emission spectra for **BD140** were measured at 2.5  $\mu\text{M}$  and 0.25  $\mu\text{M}$  dye concentrations in MCH, Diox, DMF, DMSO, and FM, respectively. The UV-vis absorption and emission spectra for **LD688** were measured at 5  $\mu\text{M}$  and 2.5  $\mu\text{M}$  dye concentrations in Diox, EtOH, ACN, and DMSO, respectively. The UV-vis

absorption and emission spectra for **DCM** were measured at 5  $\mu\text{M}$  and 1.5  $\mu\text{M}$  dye concentrations in Diox, EtOH, ACN, and DMSO, respectively.

### **Quantum yield measurements**

The quantum yields were calculated based on the relative measurement method.<sup>1</sup> We chose Rhodamine 101 as the reference dye for **BD140**, Rhodamine B, and Acid Red 52. Rhodamine 590 was selected as the reference dye for **LD688** and **DCM**.

### **Computational methods**

All density functional theory (DFT)<sup>2</sup> and time-dependent density functional theory (TD-DFT)<sup>3</sup> calculations were performed using *Gaussian 16* program.<sup>4</sup> The molecular structures both in the ground state ( $S_0$ ) and the first excited state ( $S_1$ ) were optimized using M06-2X<sup>5</sup> functional and def2-SVP<sup>6</sup> basis set. Solvation effects in different solvents were considered using the SMD<sup>7</sup> solvent model for all calculations, with the state-specific (SS)<sup>8,9</sup> formalism for correcting the excitation/de-excitation energies. All the optimized structures were confirmed at the local minima on the potential energy surfaces through the frequency calculations in both the ground state and first excited singlet state. The molecular structures were visualized by VMD software.<sup>10</sup>

## 2. Temperature-dependent spectra of Rhodamine B and Acid Red 52

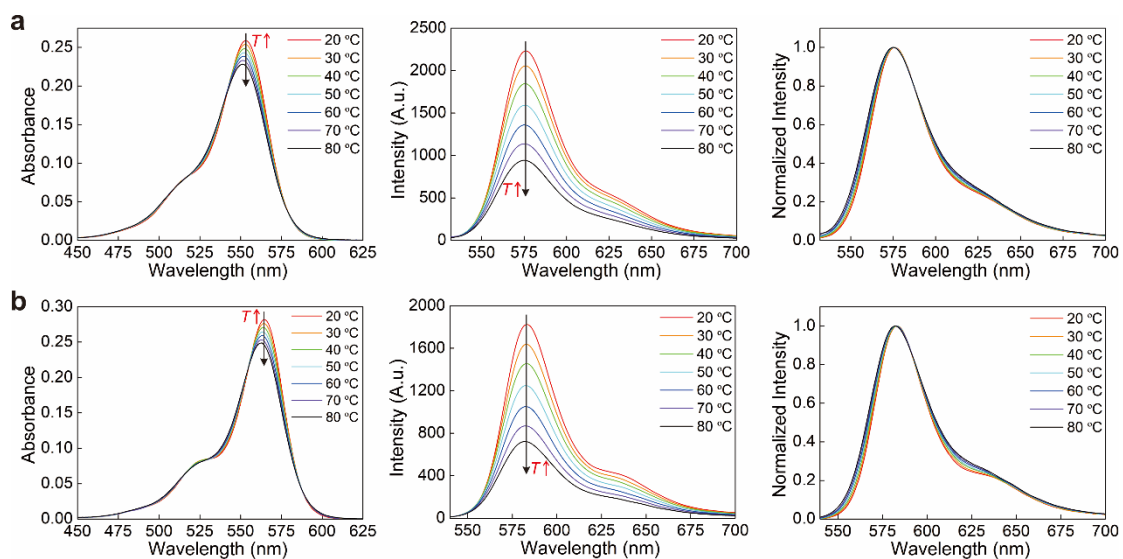

**Figure S1.** The UV-vis absorption (left), emission (middle), and normalized emission (right) spectra of (a) Rhodamine B and (b) Acid Red 52 in EG. Both of the two emission spectra were excited at 532 nm.

### 3. Optical properties and computational analysis of BD140

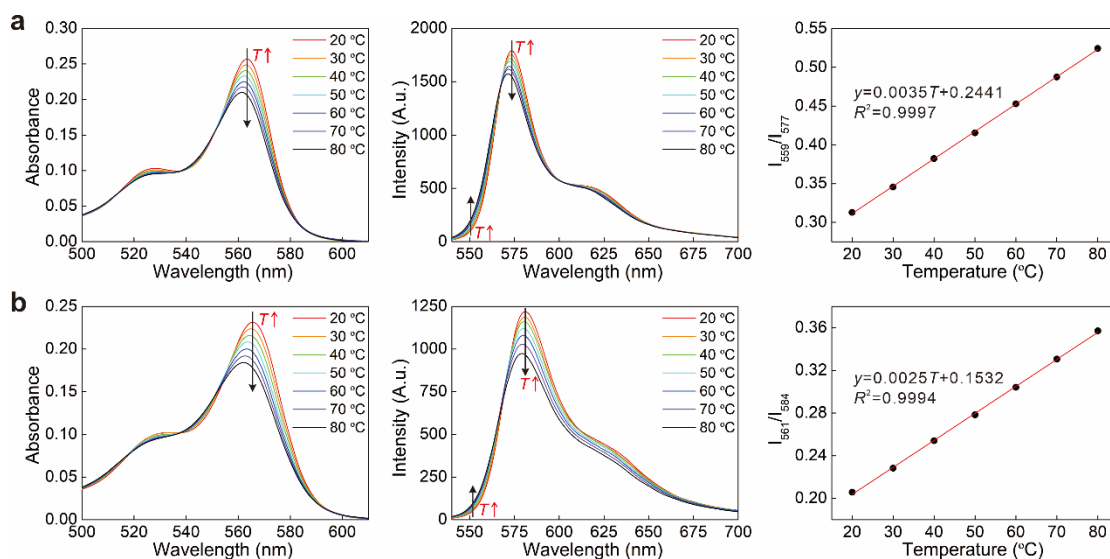

**Figure S2.** The UV-vis absorption (left), emission (middle) spectra and temperature-dependence of fluorescence intensity ratios with corresponding best linear fits (right) of **BD140** in (a) Diox (the ratio of fluorescence intensities at 559 nm and 577 nm) and (b) DMSO (the ratio of fluorescence intensities at 561 nm and 584 nm). Both of the two emission spectra were excited at 532 nm.

**Table S2.** Quantum yields of **BD140** in different solvents at various temperatures.

| T (°C) | Quantum Yield |      |       |       |       |
|--------|---------------|------|-------|-------|-------|
|        | MCH           | Diox | DMF   | DMSO  | FM    |
| 20     | 0.716         | ~1   | 0.956 | 0.955 | 0.876 |
| 30     | 0.714         | ~1   | 0.963 | 0.942 | 0.871 |
| 40     | 0.725         | ~1   | 0.956 | 0.952 | 0.845 |
| 50     | 0.727         | ~1   | 0.946 | 0.939 | 0.817 |
| 60     | 0.738         | ~1   | 0.912 | 0.928 | 0.795 |
| 70     | 0.719         | ~1   | 0.819 | 0.900 | 0.743 |
| 80     | 0.734         | ~1   | 0.863 | 0.866 | 0.680 |

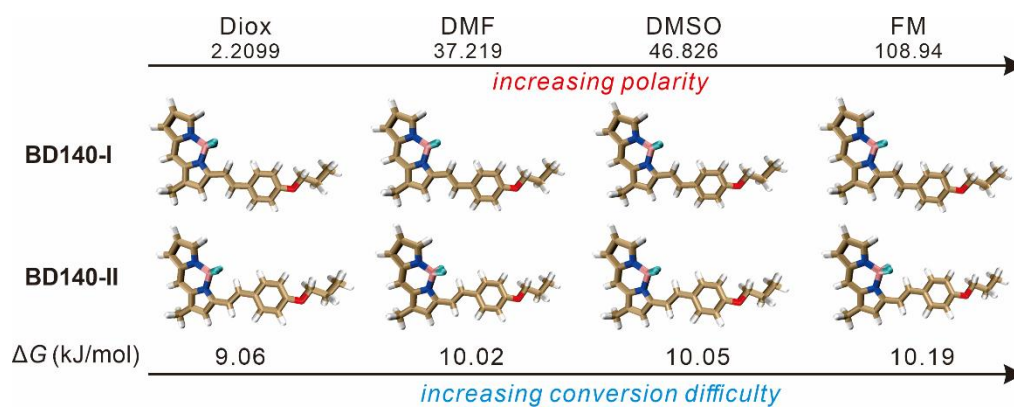

**Figure S3.** The optimized molecular structures of **BD140-I** and **BD140-II** with their relative Gibbs free energy ( $\Delta G = G_2 - G_1$ ) at the ground state in Diox, DMF, DMSO, and FM.

#### 4. Optical properties and computational analysis of LD688 and DCM

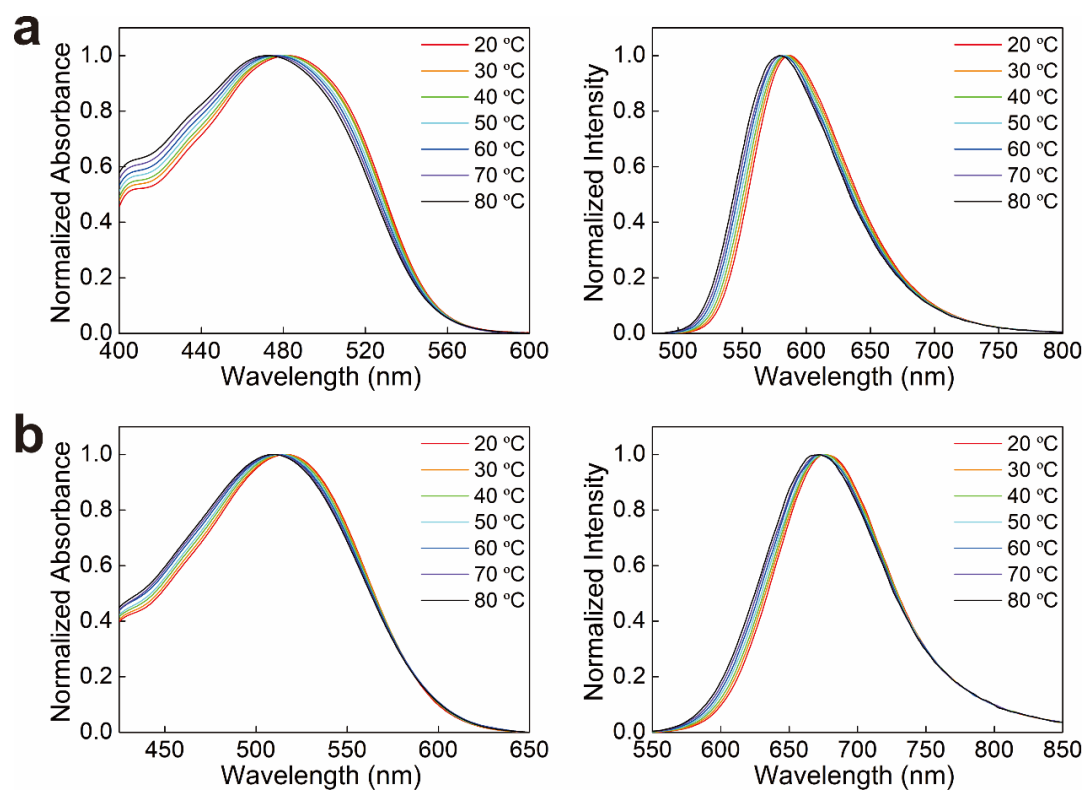

**Figure S4.** The normalized UV-vis absorption (left) and emission (right) spectra of **LD688** in (a) Diox and (b) DMSO.

**Table S3.** Quantum yields of **LD688** in Diox and DMSO at different temperatures.

| Solvent | Quantum Yield |       |       |       |       |       |       |
|---------|---------------|-------|-------|-------|-------|-------|-------|
|         | 20 °C         | 30 °C | 40 °C | 50 °C | 60 °C | 70 °C | 80 °C |
| Diox    | 0.350         | 0.272 | 0.211 | 0.155 | 0.113 | 0.085 | 0.064 |
| DMSO    | 0.173         | 0.149 | 0.126 | 0.108 | 0.093 | 0.080 | 0.070 |



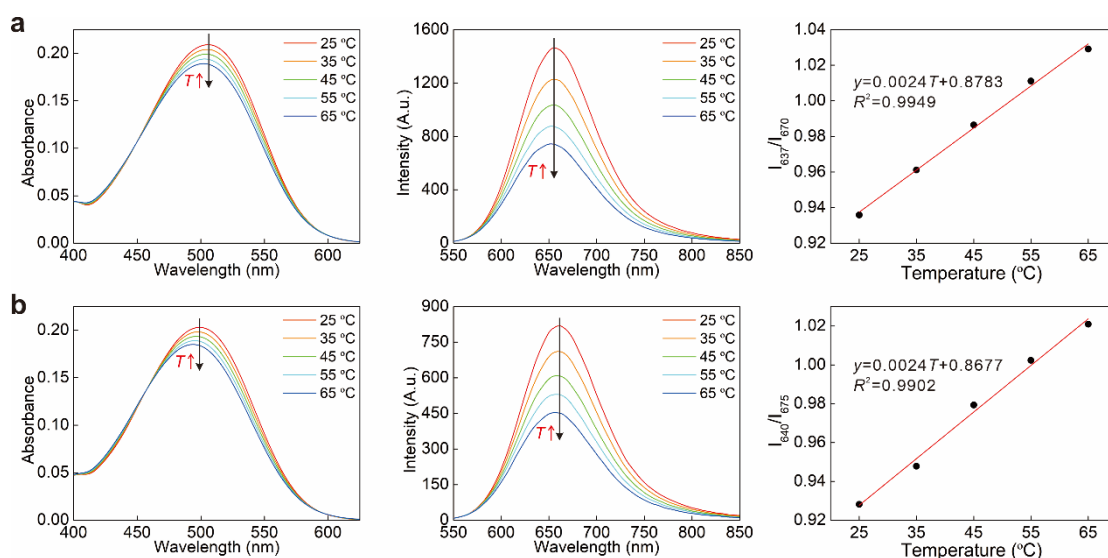

**Figure S5.** The UV-vis absorption (left), emission (middle) spectra and temperature-dependence of fluorescence intensity ratios with corresponding linear fitting equations (right) of **LD688** in (a) EtOH (the ratio of fluorescence intensities at 637 nm and 670 nm); (b) ACN (the ratio of fluorescence intensities at 640 nm and 675 nm). The emission spectra were excited at 505 nm and 495 nm, respectively.

**Table S4.** Quantum yields of **LD688** in EtOH and ACN at different temperatures.

| Solvent | Quantum Yield |       |       |       |       |
|---------|---------------|-------|-------|-------|-------|
|         | 25 °C         | 35 °C | 45 °C | 55 °C | 65 °C |
| EtOH    | 0.161         | 0.140 | 0.122 | 0.107 | 0.094 |
| ACN     | 0.092         | 0.082 | 0.073 | 0.066 | 0.058 |

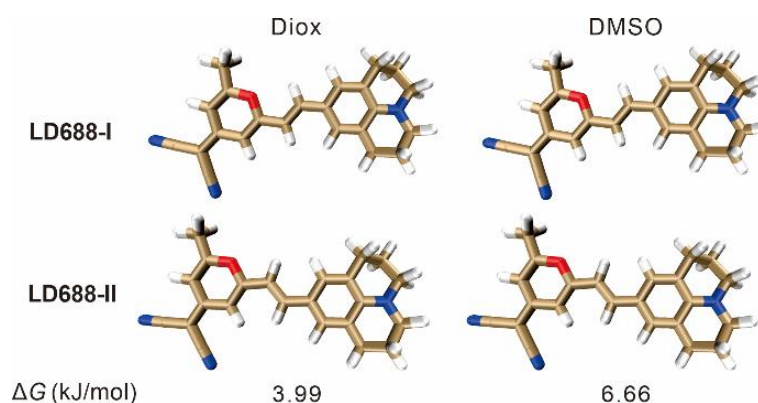

**Figure S6.** The optimized molecular structures of **LD688-I** and **LD688-II** and their relative Gibbs free energy ( $\Delta G = G_2 - G_1$ ) at the ground state in Diox and DMSO.

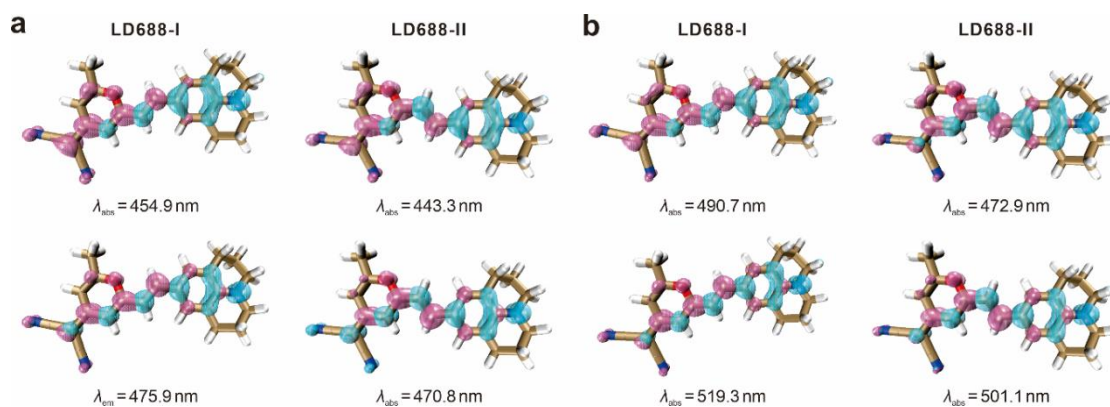

**Figure S7.** Optimized molecular structures with hole-electron distributions (cyan: hole, mauve: electron) of **LD688-I** and **LD688-II** at the ground state (top) and the first excited state (bottom) in (a) Diox and (b) DMSO. The insets show the calculated peak UV-vis absorption and emission wavelengths. Computational results show that the photoexcitation/photo-deexcitation to/from  $S_1$  is dominated by the  $\pi$ - $\pi^*$  transitions between the highest occupied molecular orbital (HOMO) and the lowest unoccupied molecular orbital (LUMO) in **LD688**.

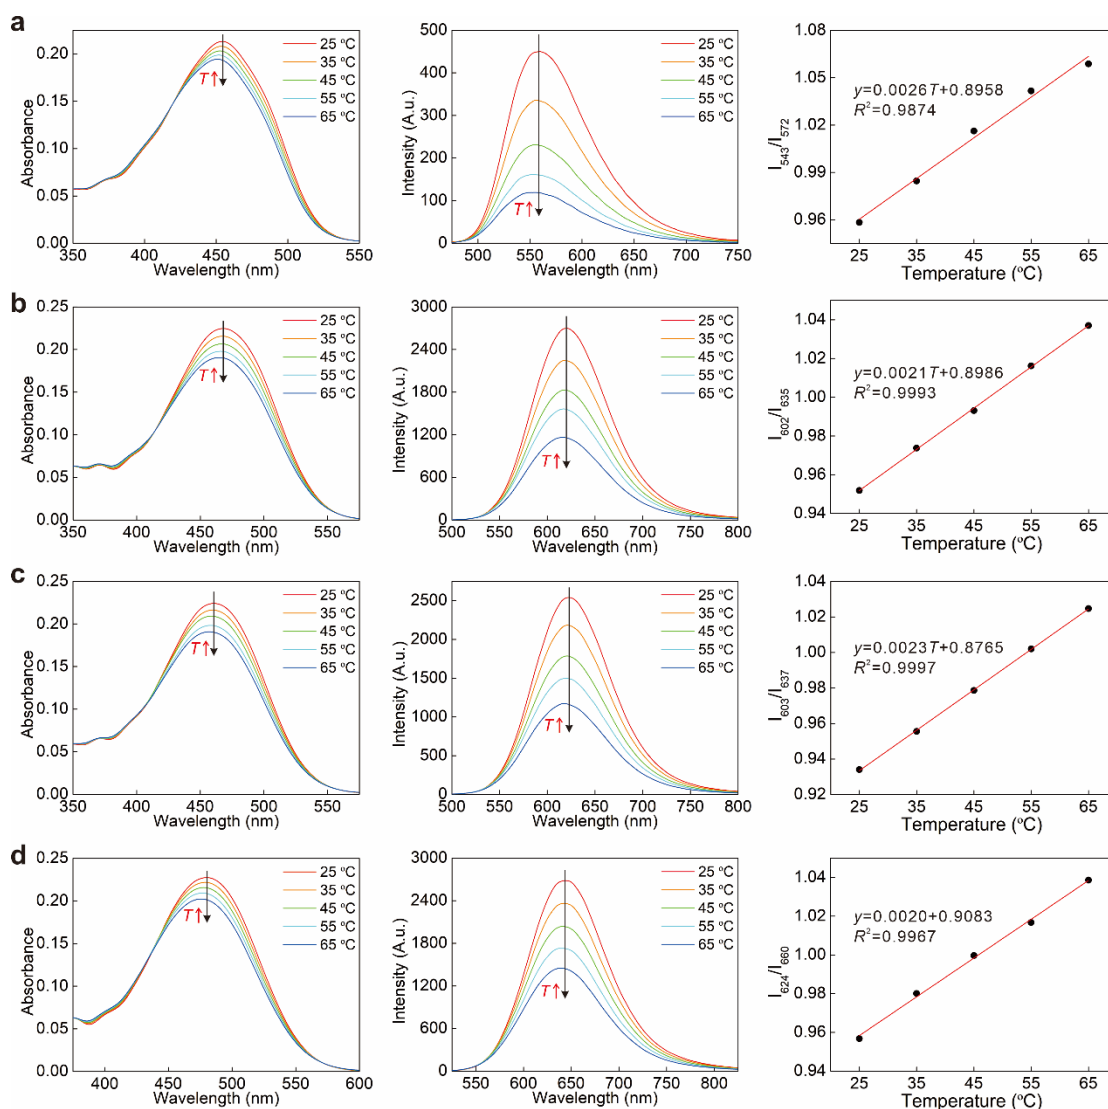

**Figure S8.** The UV-vis absorption (left), emission (middle) spectra and temperature-dependence of fluorescence intensity ratios with corresponding linear fitting equations (right) of **DCM** in (a) Diox (the emission spectrum were excited at 455 nm; the ratio of fluorescence intensities at 543 nm and 572 nm); (b) EtOH (the emission spectrum were excited at 470 nm; the ratio of fluorescence intensities at 602 nm and 635 nm); (c) ACN (the emission spectrum were excited at 460 nm, the ratio of fluorescence intensities at 603 nm and 637 nm); and (d) DMSO (the emission spectrum were excited at 480 nm; the ratio of fluorescence intensities at 624 nm and 660 nm).

**Table S5.** The quantum yields of **DCM** in four solvents at different temperatures.

| Solvent | Quantum Yield |       |       |       |       |
|---------|---------------|-------|-------|-------|-------|
|         | 25 °C         | 35 °C | 45 °C | 55 °C | 65 °C |
| Diox    | 0.065         | 0.030 | 0.021 | 0.016 | 0.011 |
| EtOH    | 0.391         | 0.343 | 0.295 | 0.265 | 0.208 |
| ACN     | 0.344         | 0.309 | 0.264 | 0.236 | 0.194 |
| DMSO    | 0.500         | 0.456 | 0.410 | 0.363 | 0.318 |

## 5. Reliability analysis of BD140 at different dye concentrations

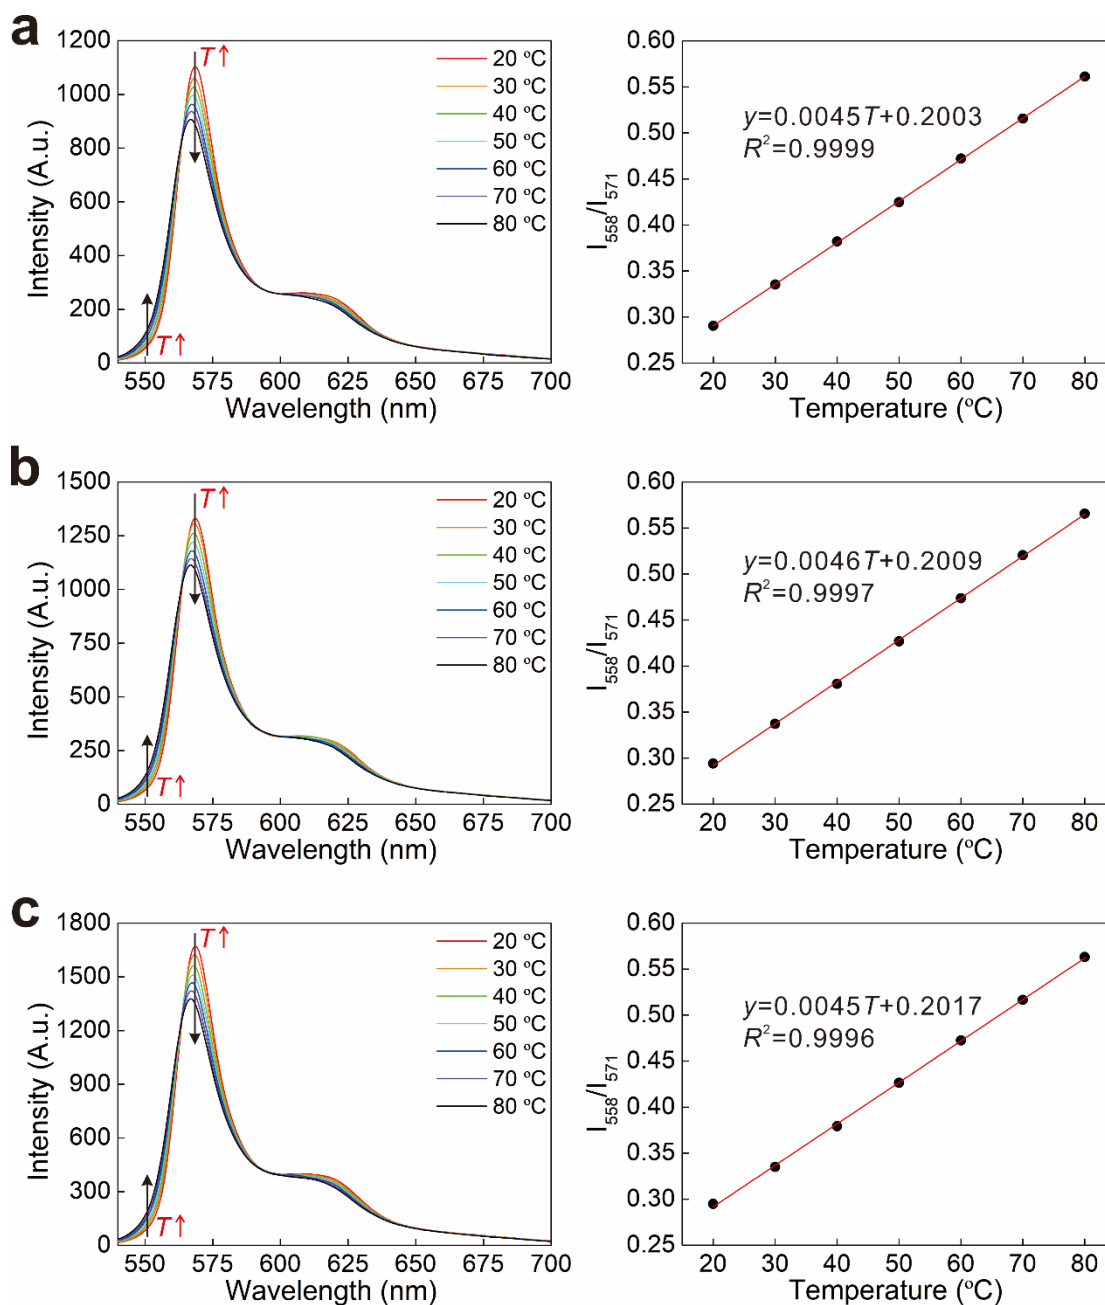

**Figure S9.** The emission spectra (left) and temperature-dependence of fluorescence intensity ratios with corresponding linear fitting equations (right) of **BD140** at (a) 0.200 μM, (b) 0.225 μM and (c) 0.275 μM in MCH. All the emission spectra were excited at 532 nm.

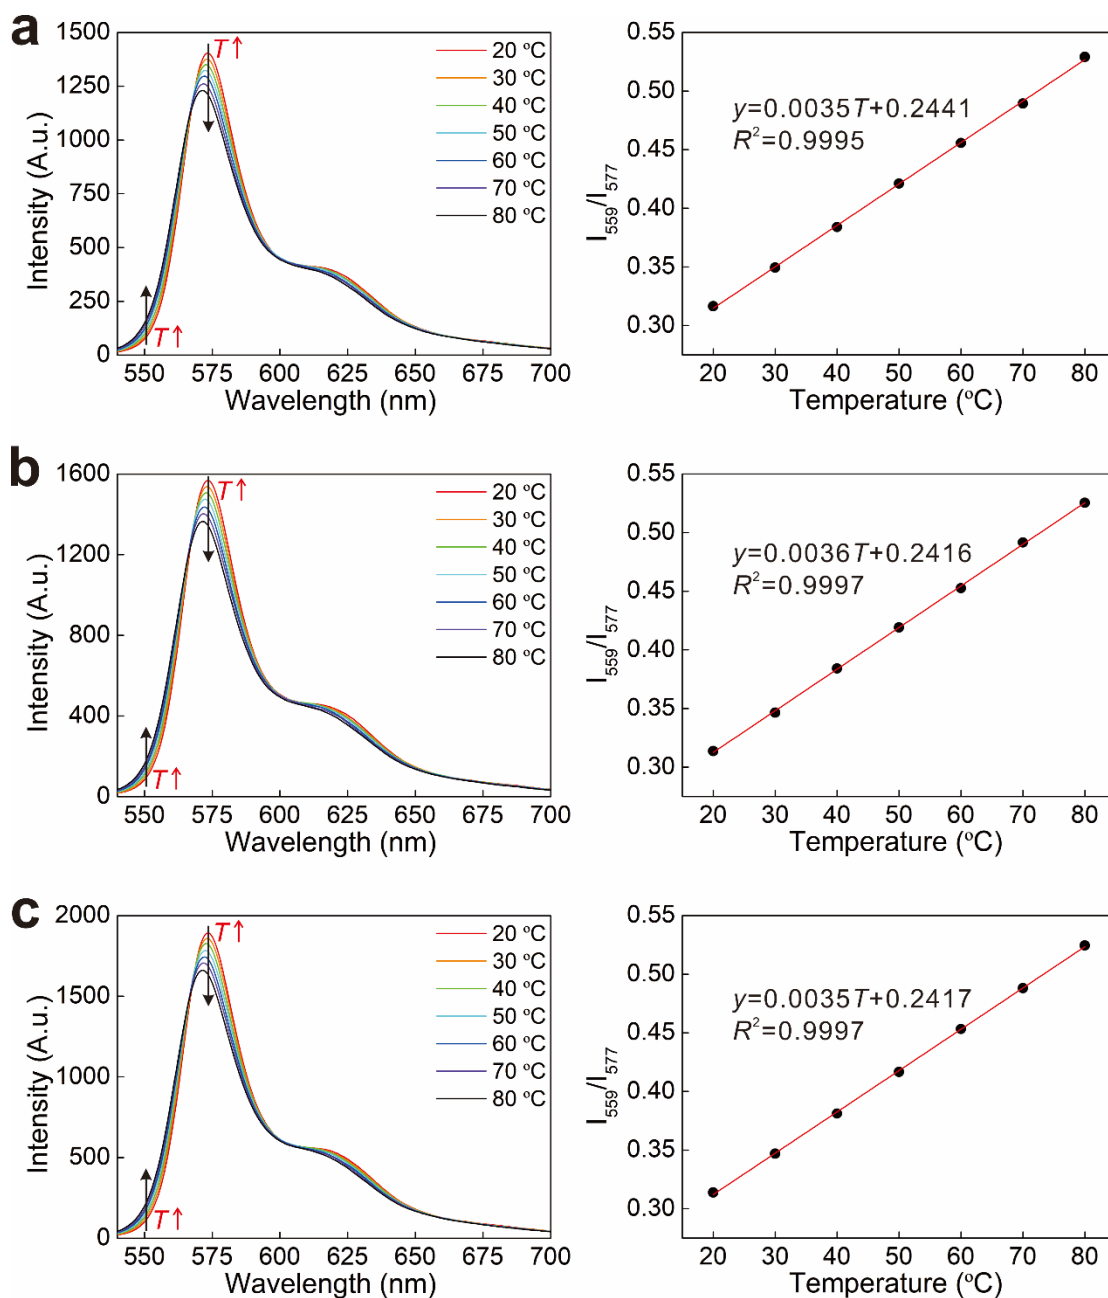

**Figure S10.** The emission spectra (left) and temperature-dependence of fluorescence intensity ratios with corresponding linear fitting equations (right) of **BD140** at (a) 0.200  $\mu\text{M}$ , (b) 0.225  $\mu\text{M}$  and (c) 0.275  $\mu\text{M}$  in Diox. All the emission spectra were excited at 532 nm.

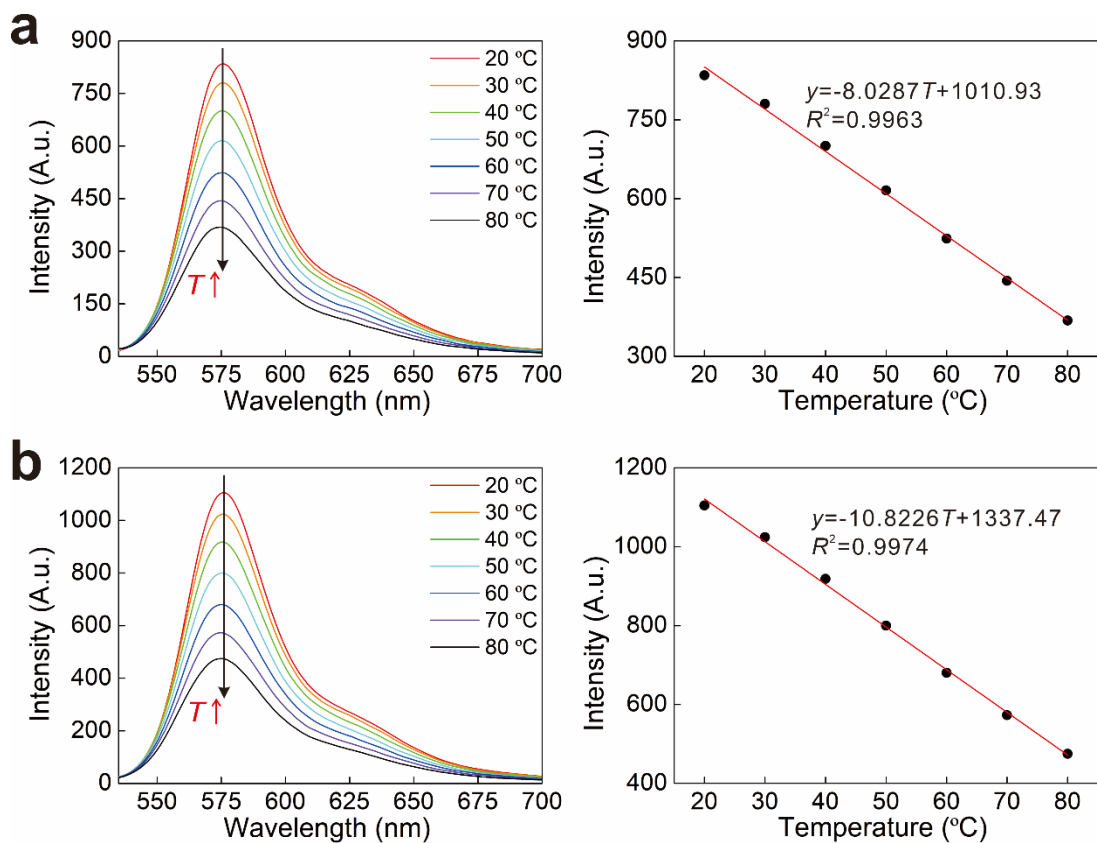

**Figure S11.** The emission spectra (left) temperature-dependence of fluorescence intensities at  $\lambda_{em}$  with corresponding linear fitting equations (right) for Rhodamine B at (a) 0.200  $\mu\text{M}$  and (b) 0.250  $\mu\text{M}$ .

## 6. References

1. C. Wurth, M. Grabolle, J. Pauli, M. Spieles and U. Resch-Genger, *Nat. Protoc.*, 2013, **8**, 1535-1550.
2. A. D. Becke, *J. Chem. Phys.*, 1993, **98**, 5648-5652.
3. G. Scalmani, M. J. Frisch, B. Mennucci, J. Tomasi, R. Cammi and V. Barone, *J. Chem. Phys.*, 2006, **124**, 94107.
4. M. J. Frisch, G. W. Trucks, H. B. Schlegel, G. E. Scuseria, M. A. Robb, J. R. Cheeseman, G. Scalmani, V. Barone, G. A. Petersson, H. Nakatsuji, X. Li, M. Caricato, A. V. Marenich, J. Bloino, B. G. Janesko, R. Gomperts, B. Mennucci, H. P. Hratchian, J. V. Ortiz, A. F. Izmaylov, J. L. Sonnenberg, D. Williams-Young, F. Ding, F. Lipparini, F. Egidi, J. Goings, B. Peng, A. Petrone, T. Henderson, D. Ranasinghe, V. G. Zakrzewski, J. Gao, N. Rega, G. Zheng, W. Liang, M. Hada, M. Ehara, K. Toyota, R. Fukuda, J. Hasegawa, M. Ishida, T. Nakajima, Y. Honda, O. Kitao, H. Nakai, T. Vreven, K. Throssell, J. A. Montgomery, Jr., J. E. Peralta, F. Ogliaro, M. J. Bearpark, J. J. Heyd, E. N. Brothers, K. N. Kudin, V. N. Staroverov, T. A. Keith, R. Kobayashi, J. Normand, K. Raghavachari, A. P. Rendell, J. C. Burant, S. S. Iyengar, J. Tomasi, M. Cossi, J. M. Millam, M. Klene, C. Adamo, R. Cammi, J. W. Ochterski, R. L. Martin, K. Morokuma, O. Farkas, J. B. Foresman, and D. J. Fox, Gaussian, Inc., Wallingford CT, 2016.
5. Y. Zhao and D. G. Truhlar, *Theor. Chem. Acc.*, 2007, **120**, 215-241.
6. F. Weigend and R. Ahlrichs, *Phys. Chem. Chem. Phys.*, 2005, **7**, 3297-3305.
7. A. V. Marenich, C. J. Cramer and D. G. Truhlar, *J. Phys. Chem. B*, 2009, **113**, 6378-6396.
8. R. Improta, V. Barone, G. Scalmani and M. J. Frisch, *J. Chem. Phys.*, 2006, **125**, 054103.
9. R. Improta, G. Scalmani, M. J. Frisch and V. Barone, *J. Chem. Phys.*, 2007, **127**, 074504.
10. W. Humphrey, A. Dalke and K. Schulten, *J. Mol. Graph.*, 1996, **14**, 33-38.
